# Supplementary material for: Evaluation of Reference Genes for Transcriptional Profiling in Two Cockroach Models
Source: MDPI journal article supplement (doi:10.3390/genes12121880), 2021-11-25
Supplement: s1 [file s1]

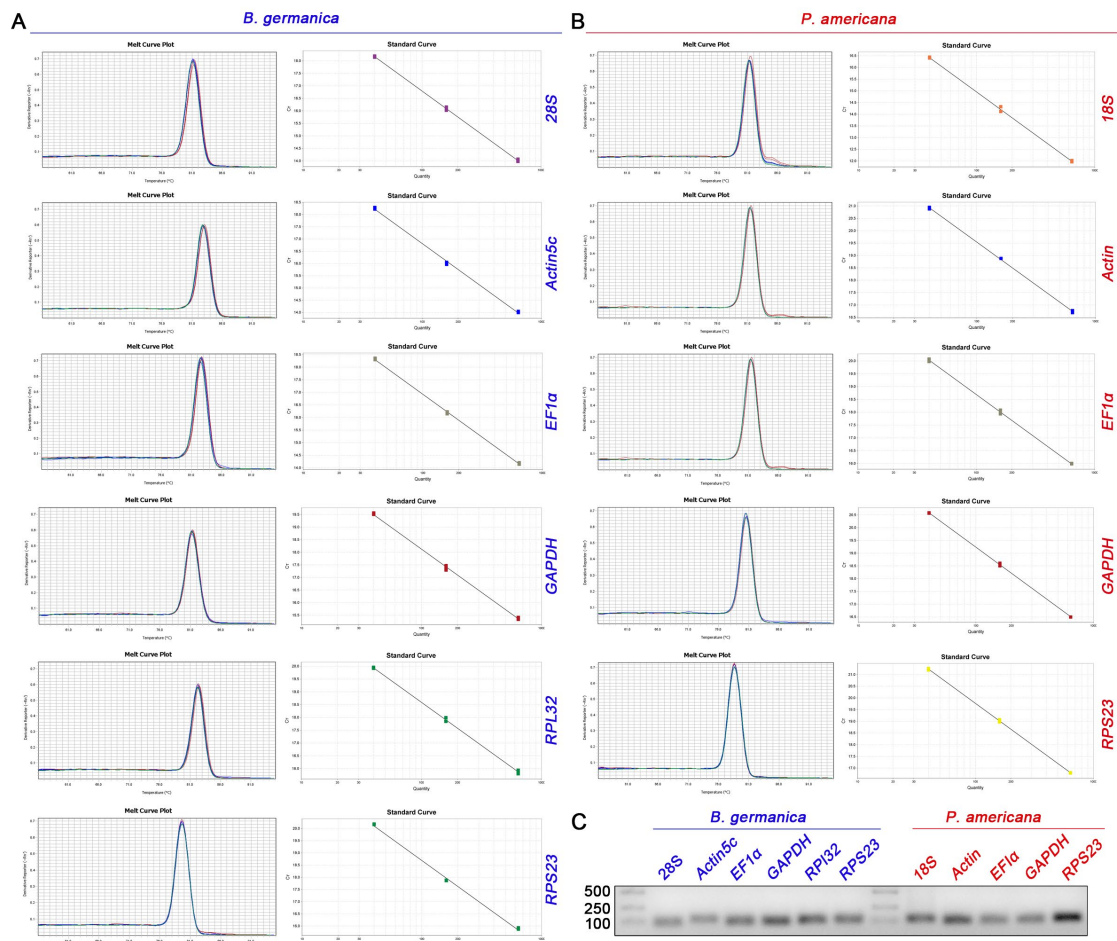

**Figure S1.** Evaluation of the specificity and amplification efficiency of the primer pairs. The specificity and efficiency of primer sets was determined by melting curve and standard analysis, respectively, and the length of qPCR products was visualized by agarose gel electrophoresis.



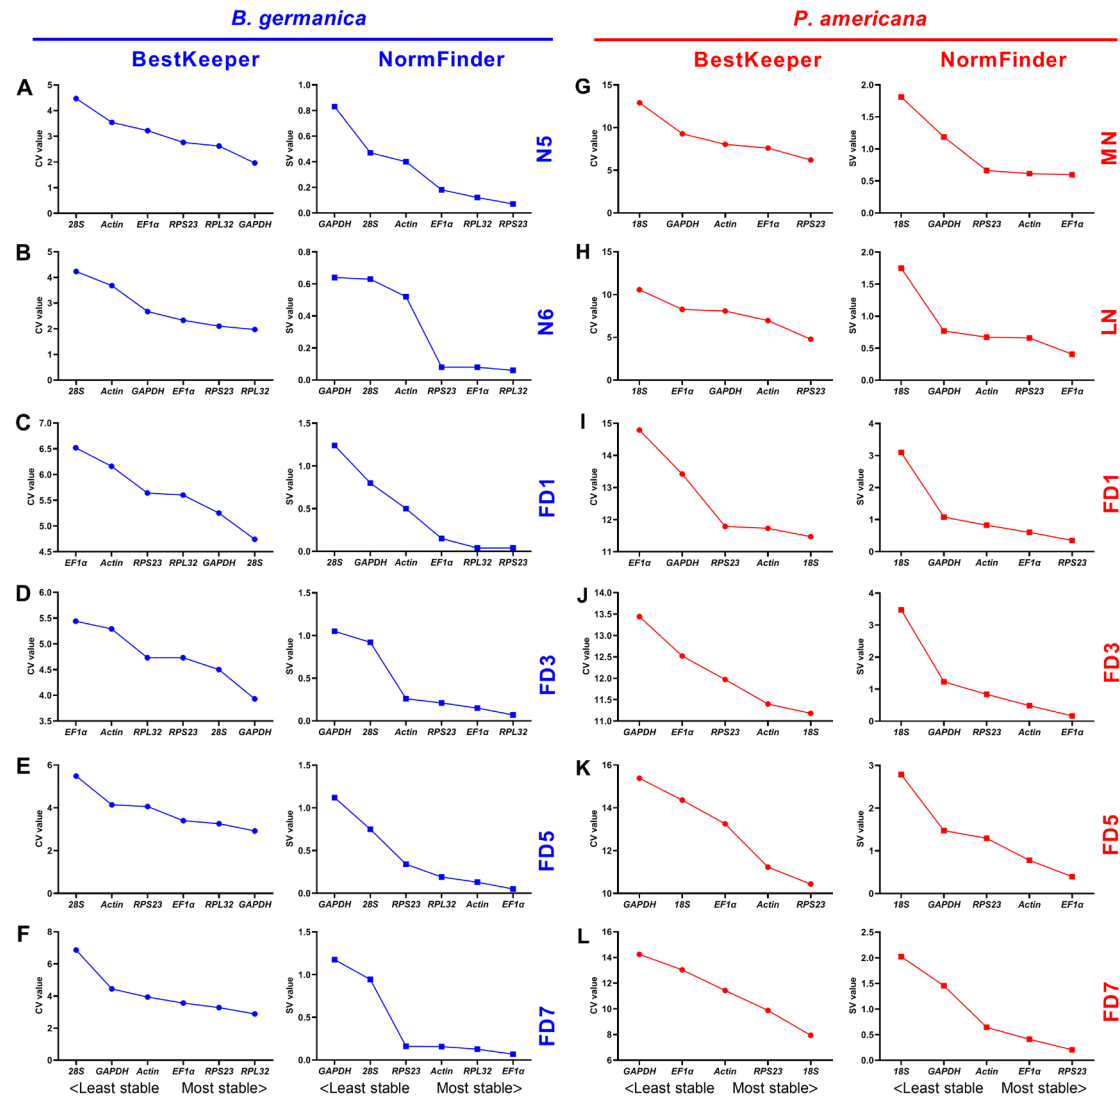

**Figure S3.** Expression stability rankings of candidate reference genes across various tissues at given developmental stages. The CV and SV values were calculated by BestKeeper and NormFinder algorithm, respectively, for candidate reference genes across various tissue types at the developmental stages of nymphs N5 (**A**) and N6 (**B**), and adults FD1 (**C**), FD3 (**D**), FD5 (**E**), and FD7 (**F**) in *B. germanica*. In *P. americana*, gene expression stability was calculated at the developmental stages of nymphs MN (**G**) and LN (**H**), and also adults FD1 (**I**), FD3 (**J**), FD5 (**K**), and FD7 (**L**).



**Table S1. Primers used for evaluation of candidate reference genes in *B. germanica*.**

| Gene name      | Primer sequences (forward and reverse)              | Length of product (bp) | Amplification efficiency (%) | R <sup>2</sup> of standard curve |
|----------------|-----------------------------------------------------|------------------------|------------------------------|----------------------------------|
| <i>GAPDH</i>   | F: CTGTTCCCAATGTGTCTGTT<br>R: CTGCCTTACCTTTGCCTTA   | 87                     | 95.49                        | 0.998                            |
| <i>EF1α</i>    | F: TGGAACTACTCCGACAAGAT<br>R: TCAATGAGACACTTGCCTTC  | 85                     | 95.38                        | 0.999                            |
| <i>Actin5c</i> | F: TGAGACCACATACTCACTCCA<br>R: CAATTCCAGGGTACATGGTG | 104                    | 92.37                        | 0.998                            |
| <i>RPL32</i>   | F: CAATCATGGAGAAAAGCCCAA<br>R: TTCCTGTTGCTTCCATAACC | 98                     | 97.82                        | 0.999                            |
| <i>RPS23</i>   | F: AAACAGCCAAACAGTGCTAT<br>R: CAATGTAGTTCAGGCAACCA  | 106                    | 91.43                        | 0.997                            |
| <i>28S</i>     | F: ATCGTCAGAGCTGGGTATAG<br>R: TATCCTGAGGGAACTTCGG   | 80                     | 94.82                        | 0.999                            |

**Table S2. Primers used for evaluation of candidate reference genes in *P. americana*.**

| Gene name    | Primer sequences (forward and reverse)             | Length of product (bp) | Amplification Efficiency (%) | R <sup>2</sup> of standard curve |
|--------------|----------------------------------------------------|------------------------|------------------------------|----------------------------------|
| <i>GAPDH</i> | F: GGCCAGAATATCATACCAGC<br>R: CGGAATGCCATACCAGTTAG | 95                     | 97.56                        | 0.999                            |
| <i>EF1α</i>  | F: AAGGAAGGAAAAGCTGATGG<br>R: AGACGAAGAGGTTTCTCAGT | 89                     | 98.35                        | 0.999                            |
| <i>Actin</i> | F: GCGATTTGACAGACTACCTC<br>R: CTCCTTAATGTCACGCACAA | 95                     | 94.08                        | 0.999                            |
| <i>RPS23</i> | F: TTCGGAAGTGTGTGAGAGTA<br>R: CCACCAGGACTTCATCATTC | 111                    | 86.97                        | 1.0                              |
| <i>18S</i>   | F: AATGGAATAGGACCTCGGTT<br>R: AATTTCACCTCTAACGTCGC | 87                     | 86.98                        | 0.998                            |
